# Supplementary material for: Anti-Osteoporotic Effect of Lactobacillus brevis AR281 in an Ovariectomized Mouse Model Mediated by Inhibition of Osteoclast Differentiation
Source: MDPI journal article supplement (doi:10.3390/biology11030359), 2022-02-24
Supplement: s1 [file s1]

**Table S1.** Primers sequences for quantitative Real-Time polymerase chain reaction.

| <b>Primers</b> | <b>Forward Primer (5'–3')</b> | <b>Reverse Primer (5'–3')</b> |
|----------------|-------------------------------|-------------------------------|
| HPRT1          | GAAGGAGATGGGAGGCAATCACATT     | AATCCAGCAGGTCAGCAAAGAACTT     |
| TNF $\alpha$   | AGGGTCTGGGCCATAGAACT          | CCACCACGCTCTTCTGTCTAC         |
| claudin-2      | ACCGTGTCTGCCAGGAATCTC         | CCAGGATGCCACCAAGGATGAA        |
| claudin-3      | TCATCGGCAGCAGCATCATCAC        | CCAGCAGCGAGTCGTACATCTTG       |
| ZO-1           | CTTCTCTTGCTGGCCCTAAAC         | TGGCTTCACTTGAGGTTTCTG         |
| occludin       | TTGAAAGTCCACCTCCTTACAGA       | CCGGATAAAAAGAGTACGCTGG        |
| TRAF6          | AAAGCGAGAGATTCTTTCCCTG        | ACTGGGGACAATTCAGTAGAGC        |
| IKK            | ACAGCCAGGAGATGGTACG           | CAGGGTGACTGAGTCGAGAC          |
| NFATc1         | GACCCGGAGTTCGACTTCG           | TGACACTAGGGGACACATAACTG       |
| NF- $\kappa$ B | AACTGGAAGCACGGATGAC           | TGTCTGTGAGTTGCCGGTCT          |
| RANK           | TGAGCCTCCGAGCAGAACTGAC        | TGCCTGTGTAGCCATCTGTTGAGT      |
| RANKL          | GATGGAAGGCTCATGGTTGGATGTG     | GGCAGCATTGATGGTGAGGTGTG       |
| OPG            | GCAGAGACGCACCTAGCACTGA        | CGCAGCACAGCCACTTGTTTCT        |
| IL-1           | TCGCAGCAGCACATCAACAAGA        | CCACGGGAAAGACACAGGTAGC        |
| IL-6           | TAGTCTTCCTACCCCAATTTCC        | TTGGTCCTTAGCCACTCCTTC         |
| IL-17          | CCACCTCACACGAGGCACAAGT        | TCAGCAGCAGCAACAGCATCAGA       |
| IL-4           | GGTCTCAACCCCCAGCTAGT          | GCCGATGATCTCTCTCAAGTGAT       |
| IL-10          | GCTCTTACTGACTGGCATGAG         | CGCAGCTCTAGGAGCATGTG          |
| ROR $\alpha$   | GTGGAGACAAATCGTCAGGAAT        | TGGTCCGATCAATCAAACAGTTC       |
| ROR $\gamma$   | GACCCACACCTCACAAATTGA         | AGTAGGCCACATTACACTGCT         |
| Osterix        | ATGGCGTCCTCTCTGCTTG           | TGAAAGGTCAGCGTATGGCTT         |
| Runx2          | ATGCTTCATTGCTCTCAGAAA         | GCACTCACTGACTCGGTTGG          |
| OPN            | AGCAAGAACTCTTCCAAGCAA         | GTGAGATTCGTCAGATTCATCCG       |
